# Supplementary material
Source: publisher site journal article supplement (https://www.dovepress.com/article/245300)
Supplement: Supplementary file 1 [file get_supplementary_file.php]

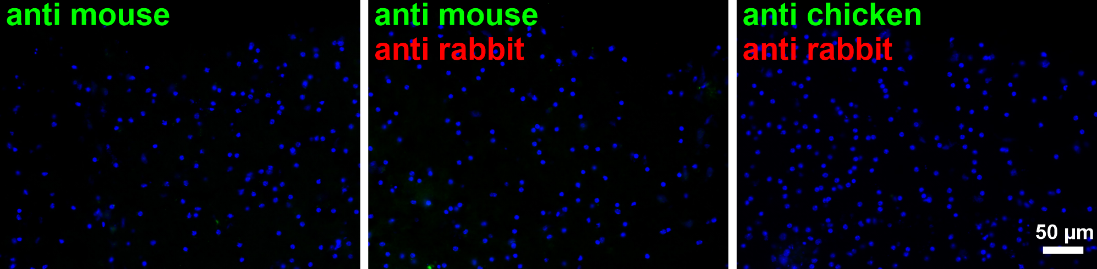


Figure S1: Secondary antibody controls to fluorescence immunostainings in Figure 6. For secondary antibody controls, primary antibodies were omitted in the staining procedure, and sections were inspected with fluorescence exposure times identical to photographs in Figure 6. Representative examples of the unstimulated controls from n = 4 independent experiments.
